# Supplementary material for: Interferon beta induces apoptosis in nasopharyngeal carcinoma cells via the TRAIL-signaling pathway
Source: PubMed Central journal article supplement (PMC5865666; doi:10.18632/oncotarget.24479), 2018-02-12
Supplement: oncotarget-09-14228-s001.pdf [file oncotarget-09-14228-s001.pdf]

# Interferon beta induces apoptosis in nasopharyngeal carcinoma cells *via* the TRAIL-signaling pathway

## SUPPLEMENTARY MATERIALS

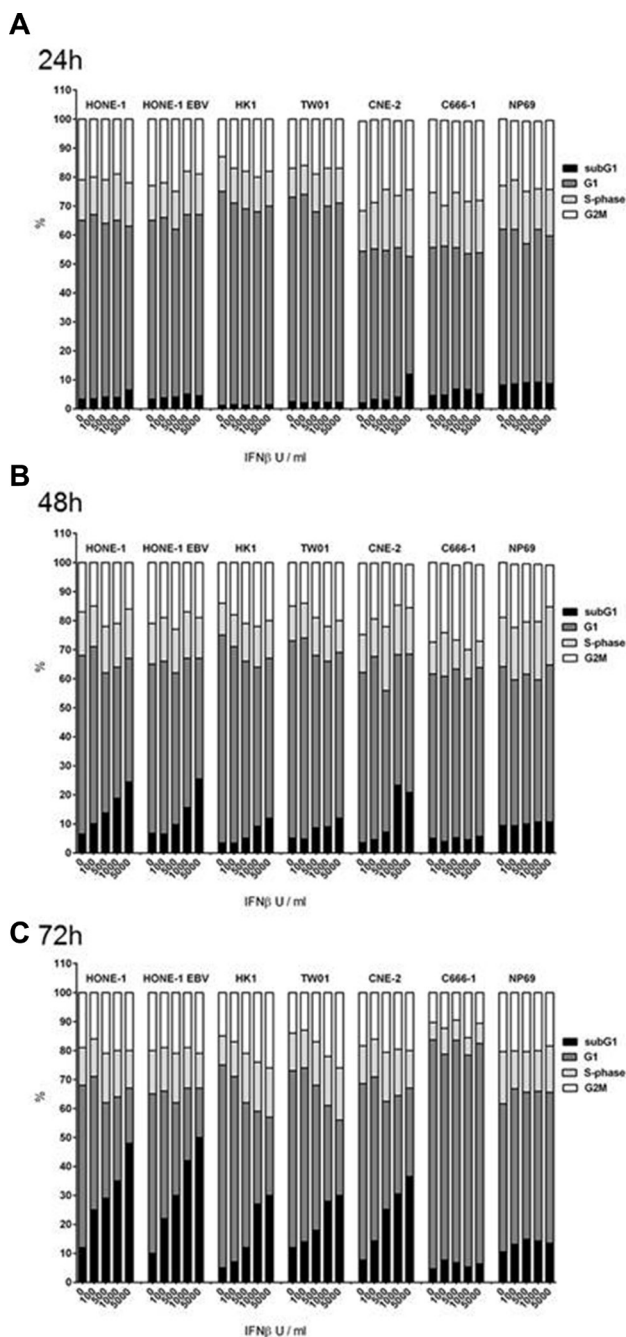

**Supplementary Figure 1: Cell cycle distribution of NPC cells after treatment with IFN $\beta$ .** NPC cell lines and the nasoeptithelial cell line NP69 were treated with increasing concentrations of IFN $\beta$  for (A) 24 h, (B) 48 h, (C) 72 h, and cell cycle analysis was performed thereafter. No major effects of IFN $\beta$  on cell cycle distribution was seen; in cell lines HK1 and TW01 a slight dose-dependent increase in G2-phase was observed after 72 h of incubation with IFN $\beta$ . Data are presented as means  $\pm$  S.E.M. of three independents experiments.

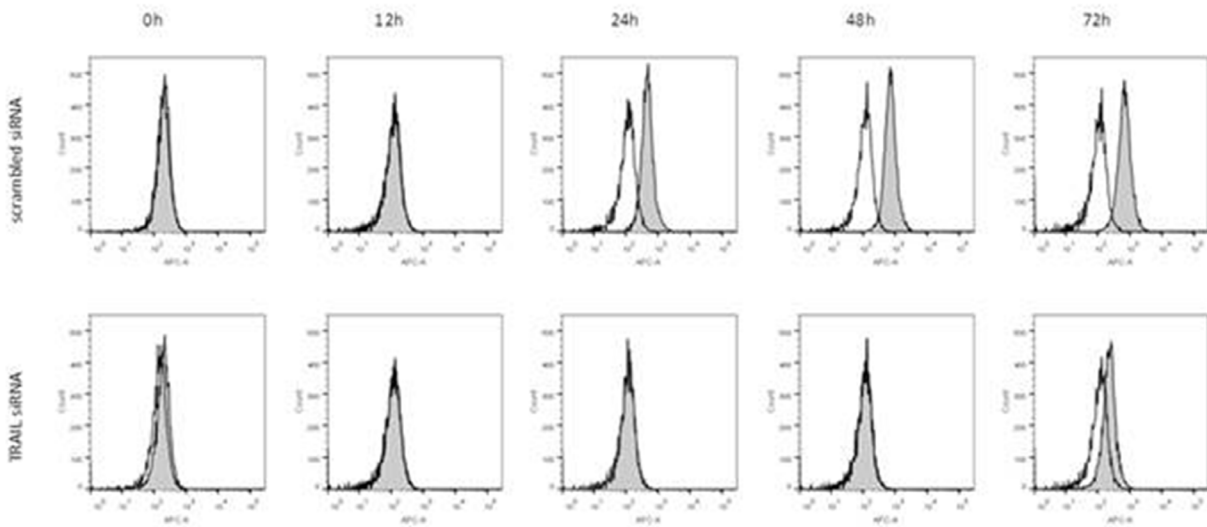

**Supplementary Figure 2: Knockdown of TRAIL in NPC cells by small-interfering RNA (siRNA).** Specific siRNA against TRAIL but not scrambled siRNA suppresses the expression of TRAIL in NPC cells. Cells of NPC cell line TW01 were incubated with 1,000 U/ml IFN $\beta$  and surface expression of TRAIL was analyzed by flow cytometry comparing IFN $\beta$ -treated cells (gray area) against non-treated cells (white area).

|            | TH01    | D21S11     | D5S818 | D13S317      | D7S820 | D16S539   | vWA    | TPOX     | AMEL | % of Match |
|------------|---------|------------|--------|--------------|--------|-----------|--------|----------|------|------------|
| HELA       | 7       | 27, 28     | 11, 12 | 12, 13.3     | 8, 12  | 9, 10     | 16, 18 | 8, 12    | X    |            |
| HONE-1     | 6, 7, 9 | 27, 30, 31 | 11, 12 | 10, 12, 13.3 | 10, 12 | 9, 10     | 14, 16 | 8, 12    | X    | 65%        |
| HONE-1 EBV | 6, 7, 9 | 27, 30     | 11, 12 | 10, 12, 13.3 | 10, 12 | 9, 10, 11 | 14, 16 | 8, 9, 12 | X    | 65%        |
| CNE-2      | 7, 9    | 27, 30     | 11, 12 | 10, 12, 13.3 | 10     | 9, 10     | 14, 16 | 8, 9, 12 | X    | 66%        |
| HK1        | 7, 9.3  | 28, 29     | 12, 14 | 11           | 8, 11  | 10, 11    | 18, 19 | 8, 11    | Y    | 41%        |
| C666-1     | 6, 8    | 29, 31, 32 | 11     | 8, 11        | 11, 12 | 11        | 17, 18 | 8, 11    | Y    | 23%        |
| TW01       | 6, 7, 9 | 26, 30     | 12, 13 | 10, 12, 13.3 | 10, 12 | 10, 11    | 14, 16 | 8, 12    | X    | 47%        |
| NP69       | 7       | 31         | 11     | 10, 12       | 11     | 11, 12    | 16, 19 | 11       | Y    | 33%        |

**Supplementary Figure 3: Short tandem repeated (STR) profiles of nasopharyngeal epithelial cell lines.** STR profiles for NPC cell lines HONE-1, HONE-1 EBV and CNE-2 show 66%, 66% and 65% matching with HeLa cells, respectively, suggesting contamination. STR profiles for cell lines HK1, TW01, C666-1 and NP69 match only between 23% and 47% with HeLa cells, ruling out contamination
